# Supplementary material
Source: PubMed Central journal article supplement (PMC6955298)
Supplement: pnas.1916576116.sapp.pdf [file pnas.1916576116.sapp.pdf]

## Supplementary information

### Regulating vitamin B12 biosynthesis via the *cblMCbl* riboswitch in *Propionibacterium* strain UF1

Jing Li,<sup>1</sup> Yong Ge,<sup>1,2</sup> Mojgan Zadeh,<sup>1,2</sup> Roy Curtiss III,<sup>1,\*</sup> and Mansour Mohamadzadeh<sup>1,2,\*</sup>

<sup>1</sup>Department of Infectious Diseases & Immunology, University of Florida, Gainesville, Florida, USA.

<sup>2</sup>Division of Gastroenterology, Hepatology & Nutrition, Department of Medicine, University of Florida, Gainesville, Florida, USA.

\*Corresponding author: [m.zadeh@ufl.edu](mailto:m.zadeh@ufl.edu)

Supplemental material

Figures. S1 to S4

Table S1 to S2

## Supplementary Figure Legends

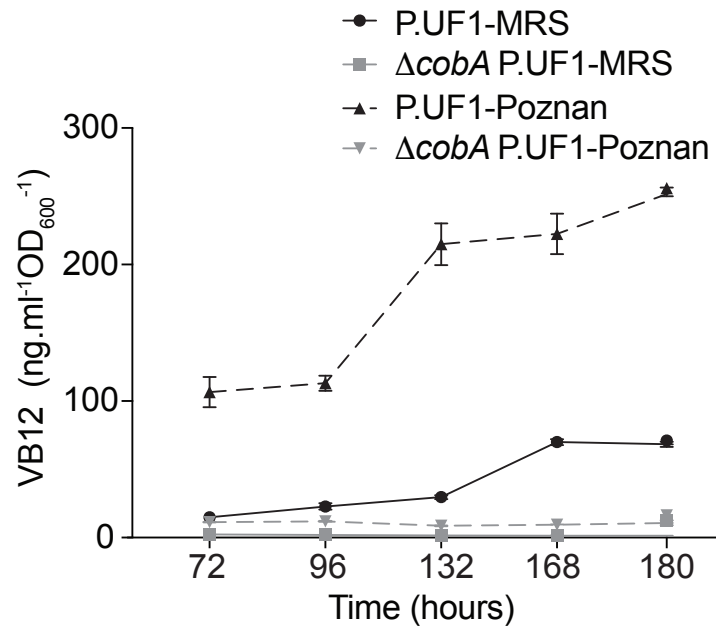

**Figure S1** *cobA* is an essential gene for VB12 biosynthesis by P. UF1. Time-course analysis of VB12 production by P. UF1 and  $\Delta cobA$  P. UF1 strains in MRS and Poznan medium. Data are representative of three independent experiments. Error bars indicate SEM.

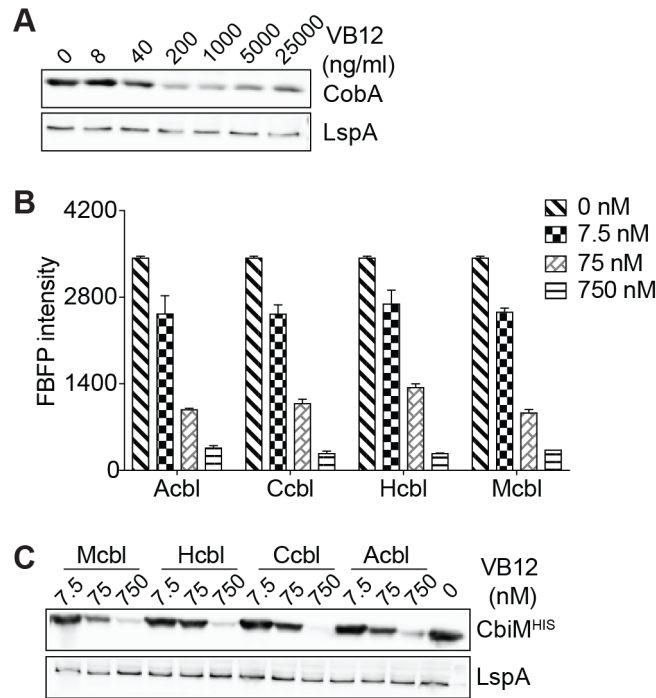

**Figure S2** The *cobA* operon is feedback-regulated by VB12. (A) WB analysis of *cobA* expression of P. UF1 incubated with increasing VB12 (0-25000 ng/ml) using mouse serum antibodies against CobA. (B) FbFP fluorescence intensity of FbFP- $\Delta cobA$  P. UF1 strain incubated with different VB12 analogues. Acbl: adenosylcobalamin, Ccbl: Cyanocobalamin, Hcbl: Hydroxocobalamin, Mcbl: Methylcobalamin. (C) WB analysis of *cbiM* expression in CbiM- $\Delta cobA$  P. UF1 strain incubated with different VB12 analogues using anti-His antibody. Data are representative of three independent experiments (B). Error bars indicate SEM.

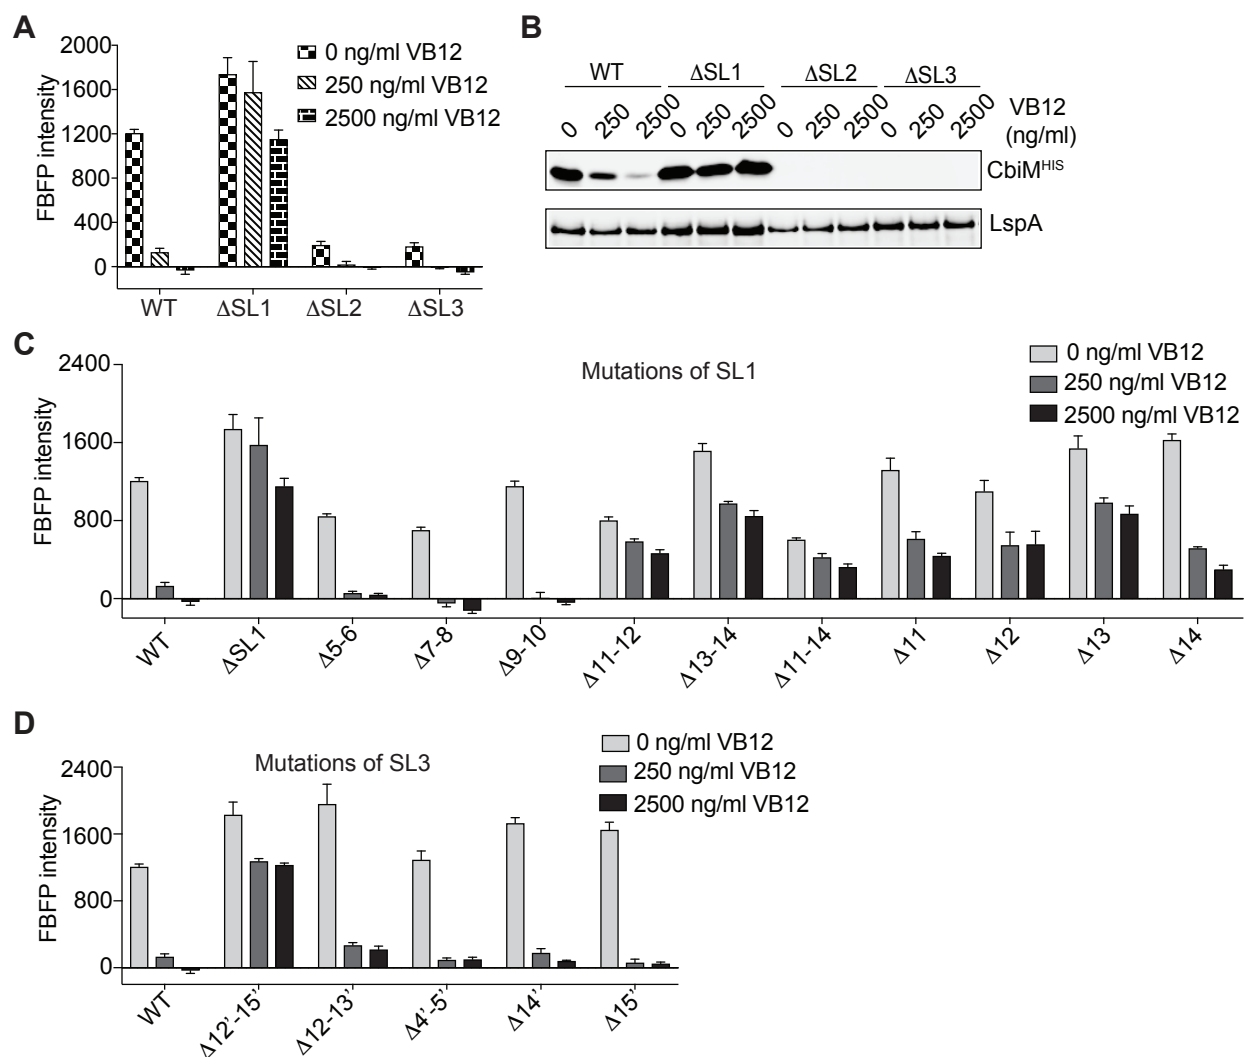

**Figure S3** Key stem-loops of *cbiMCbl* riboswitch (A) FbFP fluorescence intensity of FbFP- $\Delta cobA$  P. UF1 strain incubated with various concentrations of VB12, wild-type, SL1, SL2 and SL3 deleted mutant *cbiMCbl* riboswitch. (B) WB analysis of *cbiM* expression of CbiM- $\Delta cobA$  P. UF1 strain incubated with various concentrations of VB12 using anti-His antibody, wild-type, SL1, SL2 and SL3 deleted mutant *cbiMCbl* riboswitch. (C) FbFP fluorescence intensity driven by SL1-mutated riboswitches in response to VB12 (0, 250, 2500 ng/ml). (D) FbFP fluorescence intensity directed by SL3-mutated riboswitches with various concentrations of VB12. Data are representative of three independent experiments (A, C and D).

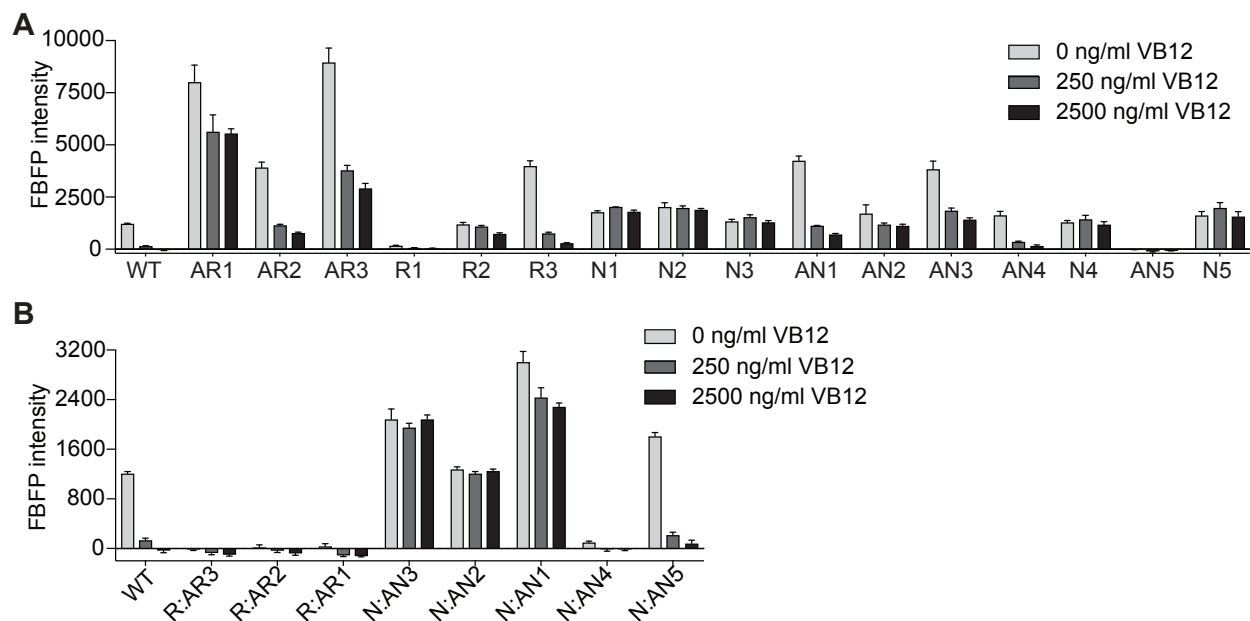

**Figure S4** *cbiMCbl* riboswitch regulates *cbiM* expression by RBS-mediated base pairing. (A) FbFP fluorescence intensity by a series of riboswitches mutated in Pkn, Pkn', sequester, or antisequester. (B) FbFP fluorescence intensity by riboswitches with paired double mutations in Pkn and Pkn' or sequester and antisequester. Data are representative of three independent experiments (A and B). Error bars indicate SEM.

**Table S1 P. UF1 derivative strains and plasmids used in this study**

| Plasmids/strains        | Description                                                                                                                          |
|-------------------------|--------------------------------------------------------------------------------------------------------------------------------------|
| Plasmids                |                                                                                                                                      |
| pYMZ                    | Expressing vector in P. UF1, <i>hygB</i> <sup>R</sup> .                                                                              |
| pUCC                    | Vector used for chromosomal insertion in P.UF1, derived of pUC19, <i>cm</i> <sup>R</sup> .                                           |
| pUCH                    | Vector used for complementary expression in P.UF1, derived of pUC19, <i>hygB</i> <sup>R</sup> .                                      |
| pET21b                  | Vector used for protein overexpression in <i>E. coli</i> , <i>Amp</i> <sup>R</sup>                                                   |
| Strains                 |                                                                                                                                      |
| NEB 5-alpha             | Competent <i>E. coli</i> used for gene cloning.                                                                                      |
| Rosetta <i>E. coli</i>  | Protein overexpression                                                                                                               |
| E-21CobA                | Rosetta <i>E. coli</i> overexpressing CobA protein                                                                                   |
| P. UF1                  | Propionibacterium UF1 was isolated from human breast milk.                                                                           |
| $\Delta$ cobA P. UF1    | Deletion of <i>cobA</i> gene in P. UF1 using pUCC                                                                                    |
| C- $\Delta$ cobA P. UF1 | Complementary expression of <i>cobA</i> gene in $\Delta$ cobA P. UF1 by the native promoter of <i>cobA</i> using pUCH.               |
| FbFP-WT                 | Transforming pYMZ harboring <i>cbiMCbl</i> riboswitch and <i>FbFP</i> into P. UF1.                                                   |
| CbiM-WT                 | Transforming pYMZ harboring <i>cbiMCbl</i> riboswitch and <i>cbiM</i> <sup>HIS6</sup> into P. UF1.                                   |
| FbFP- $\Delta$ cobA     | Transforming pYMZ harboring <i>cbiMCbl</i> riboswitch and <i>FbFP</i> into $\Delta$ cobA P. UF1.                                     |
| CbiM- $\Delta$ cobA     | Transforming pYMZ harboring <i>cbiMCbl</i> riboswitch and <i>cbiM</i> <sup>HIS6</sup> into $\Delta$ cobA P. UF1.                     |
| CbiN- $\Delta$ cobA     | Transforming pYMZ harboring <i>cbiMCbl</i> riboswitch and <i>cbiN</i> <sup>HIS6</sup> into $\Delta$ cobA P. UF1.                     |
| CbiO- $\Delta$ cobA     | Transforming pYMZ harboring <i>cbiMCbl</i> riboswitch and <i>cbiO</i> <sup>HIS6</sup> into $\Delta$ cobA P. UF1.                     |
| CobA- $\Delta$ cobA     | Transforming pYMZ harboring <i>cbiMCbl</i> riboswitch and <i>cobA</i> <sup>HIS6</sup> into $\Delta$ cobA P. UF1.                     |
| DSL1F- $\Delta$ cobA    | Transforming pYMZ harboring <i>cbiMCbl</i> riboswitch deleting SL1 mutant and <i>FbFP</i> into $\Delta$ cobA P. UF1.                 |
| DSL1CM $\Delta$ cobA    | Transforming pYMZ harboring <i>cbiMCbl</i> riboswitch deleting SL1 mutant and <i>cbiM</i> <sup>HIS6</sup> into $\Delta$ cobA P. UF1. |
| DSL2F $\Delta$ cobA     | Transforming pYMZ harboring <i>cbiMCbl</i> riboswitch deleting SL2 mutant and <i>FbFP</i> into $\Delta$ cobA P. UF1.                 |
| DSL2CM $\Delta$ cobA    | Transforming pYMZ harboring <i>cbiMCbl</i> riboswitch deleting SL2 mutant and <i>cbiM</i> <sup>HIS6</sup> into $\Delta$ cobA P. UF1. |
| DSL3F $\Delta$ cobA     | Transforming pYMZ harboring <i>cbiMCbl</i> riboswitch deleting SL3 mutant and <i>FbFP</i> into $\Delta$ cobA P. UF1.                 |
| DSL3CM $\Delta$ cobA    | Transforming pYMZ harboring <i>cbiMCbl</i> riboswitch deleting SL3 mutant and <i>cbiM</i> <sup>HIS6</sup> into $\Delta$ cobA P. UF1. |
| D5-6F $\Delta$ cobA     | Transforming pYMZ harboring <i>cbiMCbl</i> riboswitch D5-6 mutant and <i>FbFP</i> into $\Delta$ cobA P. UF1.                         |
| D5-6CM $\Delta$ cobA    | Transforming pYMZ harboring <i>cbiMCbl</i> riboswitch D5-6 mutant and <i>cbiM</i> <sup>HIS6</sup> into $\Delta$ cobA P. UF1.         |
| D7-8F $\Delta$ cobA     |                                                                                                                                      |

---

|                          |                                                                                                                                 |
|--------------------------|---------------------------------------------------------------------------------------------------------------------------------|
| D7-8CM $\Delta cobA$     | Transforming pYMZ harboring <i>cbiMCbl</i> riboswitch D7-8 mutant and <i>FbFP</i> into $\Delta cobA$ P. UF1.                    |
| D9-10F $\Delta cobA$     | Transforming pYMZ harboring <i>cbiMCbl</i> riboswitch D7-8 mutant and <i>cbiM<sup>HIS6</sup></i> into $\Delta cobA$ P. UF1.     |
| D9-10CM $\Delta cobA$    | Transforming pYMZ harboring <i>cbiMCbl</i> riboswitch D9-10 mutant and <i>FbFP</i> into $\Delta cobA$ P. UF1.                   |
| D11-12F $\Delta cobA$    | Transforming pYMZ harboring <i>cbiMCbl</i> riboswitch D9-10 mutant and <i>cbiM<sup>HIS6</sup></i> into $\Delta cobA$ P. UF1.    |
| D11-12CM $\Delta cobA$   | Transforming pYMZ harboring <i>cbiMCbl</i> riboswitch D11-12 mutant and <i>FbFP</i> into $\Delta cobA$ P. UF1.                  |
| D13-14F $\Delta cobA$    | Transforming pYMZ harboring <i>cbiMCbl</i> riboswitch D11-12 mutant and <i>cbiM<sup>HIS6</sup></i> into $\Delta cobA$ P. UF1.   |
| D13-14CM $\Delta cobA$   | Transforming pYMZ harboring <i>cbiMCbl</i> riboswitch D13-14 mutant and <i>FbFP</i> into $\Delta cobA$ P. UF1.                  |
| D11-14F $\Delta cobA$    | Transforming pYMZ harboring <i>cbiMCbl</i> riboswitch D13-14 mutant and <i>cbiM<sup>HIS6</sup></i> into $\Delta cobA$ P. UF1.   |
| D11-14CM $\Delta cobA$   | Transforming pYMZ harboring <i>cbiMCbl</i> riboswitch D11-14 mutant and <i>FbFP</i> into $\Delta cobA$ P. UF1.                  |
| D11F $\Delta cobA$       | Transforming pYMZ harboring <i>cbiMCbl</i> riboswitch D11-14 mutant and <i>cbiM<sup>HIS6</sup></i> into $\Delta cobA$ P. UF1.   |
| D11CM $\Delta cobA$      | Transforming pYMZ harboring <i>cbiMCbl</i> riboswitch D11 mutant and <i>FbFP</i> into $\Delta cobA$ P. UF1.                     |
| D12F $\Delta cobA$       | Transforming pYMZ harboring <i>cbiMCbl</i> riboswitch D11 mutant and <i>cbiM<sup>HIS6</sup></i> into $\Delta cobA$ P. UF1.      |
| D12CM $\Delta cobA$      | Transforming pYMZ harboring <i>cbiMCbl</i> riboswitch D12 mutant and <i>FbFP</i> into $\Delta cobA$ P. UF1.                     |
| D13F $\Delta cobA$       | Transforming pYMZ harboring <i>cbiMCbl</i> riboswitch D12 mutant and <i>cbiM<sup>HIS6</sup></i> into $\Delta cobA$ P. UF1.      |
| D13CM $\Delta cobA$      | Transforming pYMZ harboring <i>cbiMCbl</i> riboswitch D13 mutant and <i>FbFP</i> into $\Delta cobA$ P. UF1.                     |
| D14F $\Delta cobA$       | Transforming pYMZ harboring <i>cbiMCbl</i> riboswitch D13 mutant and <i>cbiM<sup>HIS6</sup></i> into $\Delta cobA$ P. UF1.      |
| D14CM $\Delta cobA$      | Transforming pYMZ harboring <i>cbiMCbl</i> riboswitch D14mutant and <i>FbFP</i> into $\Delta cobA$ P. UF1.                      |
| D12'-15'F $\Delta cobA$  | Transforming pYMZ harboring <i>cbiMCbl</i> riboswitch D13 mutant and <i>cbiM<sup>HIS6</sup></i> into $\Delta cobA$ P. UF1.      |
| D12'-15'CM $\Delta cobA$ | Transforming pYMZ harboring <i>cbiMCbl</i> riboswitch D12'-15' mutant and <i>FbFP</i> into $\Delta cobA$ P. UF1.                |
| D12'-13'F $\Delta cobA$  | Transforming pYMZ harboring <i>cbiMCbl</i> riboswitch D12'-15' mutant and <i>cbiM<sup>HIS6</sup></i> into $\Delta cobA$ P. UF1. |
| D12'-13'CM $\Delta cobA$ | Transforming pYMZ harboring <i>cbiMCbl</i> riboswitch D12'-13' mutant and <i>FbFP</i> into $\Delta cobA$ P. UF1.                |
| D4'-5'F $\Delta cobA$    | Transforming pYMZ harboring <i>cbiMCbl</i> riboswitch D12'-13' mutant and <i>cbiM<sup>HIS6</sup></i> into $\Delta cobA$ P. UF1. |
| D4'-5'CM $\Delta cobA$   | Transforming pYMZ harboring <i>cbiMCbl</i> riboswitch D4'-5' mutant and <i>FbFP</i> into $\Delta cobA$ P. UF1.                  |
| D14'F $\Delta cobA$      | Transforming pYMZ harboring <i>cbiMCbl</i> riboswitch D4'-5' mutant and <i>cbiM<sup>HIS6</sup></i> into $\Delta cobA$ P. UF1.   |

---

---

|                       |                                                                                                                             |
|-----------------------|-----------------------------------------------------------------------------------------------------------------------------|
| D14'CM $\Delta cobA$  | Transforming pYMZ harboring <i>cbiMCbl</i> riboswitch D14' mutant and <i>FbFP</i> into $\Delta cobA$ P. UF1.                |
| D15'F $\Delta cobA$   | Transforming pYMZ harboring <i>cbiMCbl</i> riboswitch D14' mutant and <i>cbiM<sup>HIS6</sup></i> into $\Delta cobA$ P. UF1. |
| D15'CM $\Delta cobA$  | Transforming pYMZ harboring <i>cbiMCbl</i> riboswitch D15' mutant and <i>FbFP</i> into $\Delta cobA$ P. UF1.                |
| N1F $\Delta cobA$     | Transforming pYMZ harboring <i>cbiMCbl</i> riboswitch D15' mutant and <i>cbiM<sup>HIS6</sup></i> into $\Delta cobA$ P. UF1. |
| N1CM $\Delta cobA$    | Transforming pYMZ harboring <i>cbiMCbl</i> riboswitch N1mutant and <i>FbFP</i> into $\Delta cobA$ P. UF1.                   |
| N2F $\Delta cobA$     | Transforming pYMZ harboring <i>cbiMCbl</i> riboswitch N1 mutant and <i>cbiM<sup>HIS6</sup></i> into $\Delta cobA$ P. UF1.   |
| N2CM $\Delta cobA$    | Transforming pYMZ harboring <i>cbiMCbl</i> riboswitch N2 mutant and <i>FbFP</i> into $\Delta cobA$ P. UF1.                  |
| N3F $\Delta cobA$     | Transforming pYMZ harboring <i>cbiMCbl</i> riboswitch N2 mutant and <i>cbiM<sup>HIS6</sup></i> into $\Delta cobA$ P. UF1.   |
| N3CM $\Delta cobA$    | Transforming pYMZ harboring <i>cbiMCbl</i> riboswitch N3 mutant and <i>FbFP</i> into $\Delta cobA$ P. UF1.                  |
| N4F $\Delta cobA$     | Transforming pYMZ harboring <i>cbiMCbl</i> riboswitch N3 mutant and <i>cbiM<sup>HIS6</sup></i> into $\Delta cobA$ P. UF1.   |
| N4CM $\Delta cobA$    | Transforming pYMZ harboring <i>cbiMCbl</i> riboswitch N4mutant and <i>FbFP</i> into $\Delta cobA$ P. UF1.                   |
| N5F $\Delta cobA$     | Transforming pYMZ harboring <i>cbiMCbl</i> riboswitch N4 mutant and <i>cbiM<sup>HIS6</sup></i> into $\Delta cobA$ P. UF1.   |
| N5CM $\Delta cobA$    | Transforming pYMZ harboring <i>cbiMCbl</i> riboswitch N5 mutant and <i>FbFP</i> into $\Delta cobA$ P. UF1.                  |
| AN1F $\Delta cobA$    | Transforming pYMZ harboring <i>cbiMCbl</i> riboswitch N5 mutant and <i>cbiM<sup>HIS6</sup></i> into $\Delta cobA$ P. UF1.   |
| AN1CM $\Delta cobA$   | Transforming pYMZ harboring <i>cbiMCbl</i> riboswitch AN1mutant and <i>FbFP</i> into $\Delta cobA$ P. UF1.                  |
| AN2F $\Delta cobA$    | Transforming pYMZ harboring <i>cbiMCbl</i> riboswitch AN1 mutant and <i>cbiM<sup>HIS6</sup></i> into $\Delta cobA$ P. UF1.  |
| AN2CM $\Delta cobA$   | Transforming pYMZ harboring <i>cbiMCbl</i> riboswitch AN2 mutant and <i>FbFP</i> into $\Delta cobA$ P. UF1.                 |
| AN3F $\Delta cobA$    | Transforming pYMZ harboring <i>cbiMCbl</i> riboswitch AN2 mutant and <i>cbiM<sup>HIS6</sup></i> into $\Delta cobA$ P. UF1.  |
| AN3CM $\Delta cobA$   | Transforming pYMZ harboring <i>cbiMCbl</i> riboswitch AN3 mutant and <i>FbFP</i> into $\Delta cobA$ P. UF1.                 |
| AN4F $\Delta cobA$    | Transforming pYMZ harboring <i>cbiMCbl</i> riboswitch AN3 mutant and <i>cbiM<sup>HIS6</sup></i> into $\Delta cobA$ P. UF1.  |
| AN4CM $\Delta cob$    | Transforming pYMZ harboring <i>cbiMCbl</i> riboswitch AN4mutant and <i>FbFP</i> into $\Delta cobA$ P. UF1.                  |
| AN5F $\Delta cobA$    | Transforming pYMZ harboring <i>cbiMCbl</i> riboswitch AN4 mutant and <i>cbiM<sup>HIS6</sup></i> into $\Delta cobA$ P. UF1.  |
| AN5CM $\Delta cobA$   | Transforming pYMZ harboring <i>cbiMCbl</i> riboswitch AN5 mutant and <i>FbFP</i> into $\Delta cobA$ P. UF1.                 |
| N:AN1F $\Delta cobA$  | Transforming pYMZ harboring <i>cbiMCbl</i> riboswitch AN5 mutant and <i>cbiM<sup>HIS6</sup></i> into $\Delta cobA$ P. UF1.  |
| N:AN1CM $\Delta cobA$ |                                                                                                                             |

---



---

|                       |                                                                                                                              |
|-----------------------|------------------------------------------------------------------------------------------------------------------------------|
| N:AN2F $\Delta cobA$  | Transforming pYMZ harboring <i>cbiMCbl</i> riboswitch N:AN1mutant and <i>FbFP</i> into $\Delta cobA$ P. UF1.                 |
| N:AN2CM $\Delta cobA$ | Transforming pYMZ harboring <i>cbiMCbl</i> riboswitch N:AN1 mutant and <i>cbiM<sup>HIS6</sup></i> into $\Delta cobA$ P. UF1. |
| N:AN3F $\Delta cobA$  | Transforming pYMZ harboring <i>cbiMCbl</i> riboswitch N:AN2 mutant and <i>FbFP</i> into $\Delta cobA$ P. UF1.                |
| N:AN3CM $\Delta cobA$ | Transforming pYMZ harboring <i>cbiMCbl</i> riboswitch N:AN2 mutant and <i>cbiM<sup>HIS6</sup></i> into $\Delta cobA$ P. UF1. |
| N:AN4F $\Delta cobA$  | Transforming pYMZ harboring <i>cbiMCbl</i> riboswitch N:AN3 mutant and <i>FbFP</i> into $\Delta cobA$ P. UF1.                |
| N:AN4CM $\Delta cobA$ | Transforming pYMZ harboring <i>cbiMCbl</i> riboswitch N:AN3 mutant and <i>cbiM<sup>HIS6</sup></i> into $\Delta cobA$ P. UF1. |
| N:AN5F $\Delta cobA$  | Transforming pYMZ harboring <i>cbiMCbl</i> riboswitch N:AN4mutant and <i>FbFP</i> into $\Delta cobA$ P. UF1.                 |
| N:AN5CM $\Delta cobA$ | Transforming pYMZ harboring <i>cbiMCbl</i> riboswitch N:AN4 mutant and <i>cbiM<sup>HIS6</sup></i> into $\Delta cobA$ P. UF1. |
| R1F $\Delta cobA$     | Transforming pYMZ harboring <i>cbiMCbl</i> riboswitch N:AN5 mutant and <i>FbFP</i> into $\Delta cobA$ P. UF1.                |
| R1CM $\Delta cobA$    | Transforming pYMZ harboring <i>cbiMCbl</i> riboswitch N:AN5 mutant and <i>cbiM<sup>HIS6</sup></i> into $\Delta cobA$ P. UF1. |
| R2F $\Delta cobA$     | Transforming pYMZ harboring <i>cbiMCbl</i> riboswitch R1mutant and <i>FbFP</i> into $\Delta cobA$ P. UF1.                    |
| R2CM $\Delta cobA$    | Transforming pYMZ harboring <i>cbiMCbl</i> riboswitch R1 mutant and <i>cbiM<sup>HIS6</sup></i> into $\Delta cobA$ P. UF1.    |
| R3F $\Delta cobA$     | Transforming pYMZ harboring <i>cbiMCbl</i> riboswitch R2 mutant and <i>FbFP</i> into $\Delta cobA$ P. UF1.                   |
| R3CM $\Delta cobA$    | Transforming pYMZ harboring <i>cbiMCbl</i> riboswitch R2 mutant and <i>cbiM<sup>HIS6</sup></i> into $\Delta cobA$ P. UF1.    |
| AR1F $\Delta cobA$    | Transforming pYMZ harboring <i>cbiMCbl</i> riboswitch R3 mutant and <i>FbFP</i> into $\Delta cobA$ P. UF1.                   |
| AR1CM $\Delta cobA$   | Transforming pYMZ harboring <i>cbiMCbl</i> riboswitch R3 mutant and <i>cbiM<sup>HIS6</sup></i> into $\Delta cobA$ P. UF1.    |
| AR2F $\Delta cobA$    | Transforming pYMZ harboring <i>cbiMCbl</i> riboswitch AR1mutant and <i>FbFP</i> into $\Delta cobA$ P. UF1.                   |
| AR2CM $\Delta cobA$   | Transforming pYMZ harboring <i>cbiMCbl</i> riboswitch AR1 mutant and <i>cbiM<sup>HIS6</sup></i> into $\Delta cobA$ P. UF1.   |
| AR3F $\Delta cobA$    | Transforming pYMZ harboring <i>cbiMCbl</i> riboswitch AR2 mutant and <i>FbFP</i> into $\Delta cobA$ P. UF1.                  |
| AR3CM $\Delta cobA$   | Transforming pYMZ harboring <i>cbiMCbl</i> riboswitch AR2 mutant and <i>cbiM<sup>HIS6</sup></i> into $\Delta cobA$ P. UF1.   |
| R:AR1F $\Delta cobA$  | Transforming pYMZ harboring <i>cbiMCbl</i> riboswitch AR3 mutant and <i>FbFP</i> into $\Delta cobA$ P. UF1.                  |
| R:AR1CM $\Delta cobA$ | Transforming pYMZ harboring <i>cbiMCbl</i> riboswitch AR3 mutant and <i>cbiM<sup>HIS6</sup></i> into $\Delta cobA$ P. UF1.   |
| R:AR2F $\Delta cobA$  | Transforming pYMZ harboring <i>cbiMCbl</i> riboswitch R:AR1mutant and <i>FbFP</i> into $\Delta cobA$ P. UF1.                 |
| R:AR2CM $\Delta cobA$ | Transforming pYMZ harboring <i>cbiMCbl</i> riboswitch R:AR1 mutant and <i>cbiM<sup>HIS6</sup></i> into $\Delta cobA$ P. UF1. |

---

---

|                            |                                                                                                                                                                                                                                                                                                                                                         |
|----------------------------|---------------------------------------------------------------------------------------------------------------------------------------------------------------------------------------------------------------------------------------------------------------------------------------------------------------------------------------------------------|
| R:AR3F $\Delta cobA$       | Transforming pYMZ harboring <i>cbiMCbl</i> riboswitch R:AR2 mutant and <i>FbFP</i> into $\Delta cobA$ P. UF1.                                                                                                                                                                                                                                           |
| R:AR3CM $\Delta cobA$      | Transforming pYMZ harboring <i>cbiMCbl</i> riboswitch R:AR2 mutant and <i>cbiM<sup>HIS6</sup></i> into $\Delta cobA$ P. UF1.                                                                                                                                                                                                                            |
| R:AR3CO $\Delta cobA$      | Transforming pYMZ harboring <i>cbiMCbl</i> riboswitch R:AR3 mutant and <i>FbFP</i> into $\Delta cobA$ P. UF1.                                                                                                                                                                                                                                           |
| R:tR $\Delta cobA$         | Transforming pYMZ harboring <i>cbiMCbl</i> riboswitch R:AR3 mutant and <i>cbiM<sup>HIS6</sup></i> into $\Delta cobA$ P. UF1.                                                                                                                                                                                                                            |
| R:AR3tR $\Delta cobA$      | Transforming pYMZ harboring <i>cbiMCbl</i> riboswitch R:AR3 mutant and <i>cbiO<sup>HIS6</sup></i> into $\Delta cobA$ P. UF1.                                                                                                                                                                                                                            |
| OW-operon $\Delta cobA$    | Transforming pYMZ harboring <i>cbiMCbl</i> riboswitch and <i>tetR</i> into $\Delta cobA$ P. UF1.                                                                                                                                                                                                                                                        |
| ODSL1-operon $\Delta cobA$ | Transforming pYMZ harboring <i>cbiMCbl</i> riboswitch R:AR3 mutant and <i>tetR</i> into $\Delta cobA$ P. UF1.<br>Transforming pYMZ harboring <i>cbiMCbl</i> riboswitch and <i>cobA</i> operon into $\Delta cobA$ P. UF1.<br>Transforming pYMZ harboring <i>cbiMCbl</i> riboswitch deleting SL1 mutant and <i>cobA</i> operon into $\Delta cobA$ P. UF1. |

---

**Table S2 Primers used in this study**

| Name       | Sequence (5'-3')                                            | Usage                                |
|------------|-------------------------------------------------------------|--------------------------------------|
| cobAbam-F  | CCCGGATCCctcgtcggcgccgggcccggc                              | Deletion of <i>cobA</i> gene in P.   |
| cobAxba-R  | CCCTCTAGAgcggacgcacgtggtgcgcgtcca                           | UF1                                  |
| P1         | gtggcactcgtggtgatctt                                        | For identifying <i>cobA</i> mutant   |
| P2         | GAGCGAGGAAGCGGAAGAG                                         | and complementary strain             |
| P3         | ccccggcgctacaaggacatcga                                     |                                      |
| P4         | ccgccctcctgttgatgttctggt                                    |                                      |
| Amy-cobA-1 | CCCGGATCCcagacgccggcggtccaccc                               | For constructing strain for          |
| Amy-cobA-2 | cgtdggggccgtcgtagtdgggacgatgcatgtgagcgactggcgacgaga         | complementary expression of          |
| Amy-cobA-3 | tctcgtgccagtcgctcacatgcatgctccactacgacgccccacg              | <i>cobA</i> gene in $\Delta cobA$ P. |
| Amy-cobA-4 | gccccggcaacagtggtggtcatgacgcacgatccccgagaaaggaatgcc         |                                      |
| Amy-cobA-5 | ggcattcctttctcgggatcgtgcgcatgaccaccacactgttccccggc          |                                      |
| Amy-cobA-6 | CCCTCTAGAtcagtggtcgtggcgcgcgat                              |                                      |
| 21-cobA-F  | CCCGGATCCatgaccaccacactgttccccggca                          | Overexpression of <i>cobA</i> in     |
| 21-cobA-R  | GCGCTCGAGgtggtcgtggcgcgcgatgg                               | <i>E. coli</i>                       |
| S-cobA-1   | CCCGGATCCcgtcccactacgacggccc                                | For constructing FbFP-WT             |
|            |                                                             | and CbiM-WT mutants                  |
| S-cobA-22  | TGGTGGTGCGACGAGCCCATggcattcctttctcgggatcgtg                 | For constructing FbFP-WT             |
| S-cobA-33  | cacgatcccagagaaaggaatgccATGGGCTCGTCGCACCA                   | mutant                               |
| S-cobA-4   | CCCTCTAGATCAGTGCTTGGCCTGGCCCT                               | For constructing FbFP-WT             |
|            |                                                             | mutant                               |
| ScbiM-5    | CCCTCTAGAtcaGTGGTGGTGGTGGTGGTGgacatgtgccacctccggaacct       | For constructing W-CM mutant         |
| DSL1-F     | gttcacagtggcgcgaccgtg cttcctgcaccacgggcgagg                 | For constructing DSL1F/CM            |
| DSL1-R     | cctgcgccgtggtgcaggaag cacggtcgcgccactgtgaac                 | mutants                              |
| DSL2-F     | ggggcatttgcctcgaatggt tcggtgaaccgacttctgcac                 | For constructing DSL2F/CM            |
| DSL2-R     | gtgcaggaagtcggttaagccga aacatttcggagcaaatgcccc              | mutants                              |
| DSL3-F     | gtccgtggccagttcctgactct gttcacagtggcgcgaccgtg               | For constructing DSL3F/CM            |
| DSL3-R     | cacggtcgcgccactgtgaac agagtcaggaactggccacggac               | mutants                              |
| SL1-5-6F   | tcgcccgtggtgcaggaagtcggGCcaagccgacacggtcgcgccactgtgaacatttc | For constructing D5-6F/CM            |
| SL1-5-6R   | gaaatgttcacagtggcgcgaccgtgtcggcttGCccgacttctgcaccacgggcgA   | mutants                              |
| SL1-7-8F   | TcgcccgtggtgcaggaagtcggtTGagccgacacggtcgcgccactgtgaacatttc  | For constructing D7-8F/CM            |
| SL1-7-8R   | gaaatgttcacagtggcgcgaccgtgtcggctCAaaccgacttctgcaccacgggcgA  | mutants                              |
| SL1-9-10F  | TcgcccgtggtgcaggaagtcggttcaCTccgacacggtcgcgccactgtgaacatttc | For constructing D9-10F/CM           |
| SL1-9-10R  | gaaatgttcacagtggcgcgaccgtgtcggAGtgaaccgacttctgcaccacgggcgA  | mutants                              |
| SL1-11-12F | TcgcccgtggtgcaggaagtcggttaagTAGacacggtcgcgccactgtgaacatttc  | For constructing D11-12F/CM          |
| SL1-11-12R | gaaatgttcacagtggcgcgaccgtgtcTActtgaaccgacttctgcaccacgggcgA  | mutants                              |
| SL1-13-14F | TcgcccgtggtgcaggaagtcggttaagccTGcacggtcgcgccactgtgaacatttc  | For constructing D13-14F/CM          |
| SL1-13-14R | gaaatgttcacagtggcgcgaccgtgCAggcttgaaccgacttctgcaccacgggcgA  | mutants                              |
| SL1-11-14F | tcgcccgtggtgcaggaagtcggttaagATAGcacggtcgcgccactgtgaacatttc  | For constructing D11-14F/CM          |
| SL1-11-14R | gaaatgttcacagtggcgcgaccgtgCTATcttgaaccgacttctgcaccacgggcgA  | mutants                              |
| A9G-F      | tcgcccgtggtgcaggaagtcggttca GgccgacacggtcgcgccactgtgaaCA    | For constructing D9F/CM              |
| A9G-R      | TGttcacagtggcgcgaccgtgtcggcCtgaaccgacttctgcaccacgggcgA      | mutants                              |
| C11A-F     | gccccgtggtgcaggaagtcggttcaagAcgacacggtcgcgccactgtgaacatt    | For constructing D11F/CM             |
| C11A-R     | aatgttcacagtggcgcgaccgtgtcTctgaaccgacttctgcaccacggg         | mutants                              |
| C12A-F     | gccccgtggtgcaggaagtcggttcaagcAgacacggtcgcgccactgtgaacatt    | For constructing D12F/CM             |
| C12A-R     | aatgttcacagtggcgcgaccgtgtcTgcttgaaccgacttctgcaccacggg       | mutants                              |
| G10T-F     | tcgcccgtggtgcaggaagtcggttca aTccgacacggtcgcgccactgtgaaCA    | For constructing D10F/CM             |
| G10T-R     | TGttcacagtggcgcgaccgtgtcggAttgaaccgacttctgcaccacgggcgA      | mutants                              |

|            |                                                              |                               |
|------------|--------------------------------------------------------------|-------------------------------|
| G13T-F     | cccgtggtgcaggaagtgcggttcaagcc Tacacggtcgcgccactgtgaacatttcg  | For constructing D13'F/CM     |
| G13T-R     | cgaaatgtcacagtggcgcgaccgtgtAggcttgaaccgacttctgcaccacggg      | mutants                       |
| A14G-F     | cccgtggtgcaggaagtgcggttcaagcc gGcacggtcgcgccactgtgaacatttcg  | For constructing D14F/CM      |
| A14G-R     | cgaaatgtcacagtggcgcgaccgtgCcggttgaaccgacttctgcaccacggg       | mutants                       |
| SL3-DF     | gttctgacttcatcgcggggcgtccgaaatgtcacagtggcgc                  | For constructing D12'-15'F/CM |
| SL3-DR     | gcgccactgtgaacatttcggagc gccccgcgatgagagtcaggaac             | mutants                       |
| SL3-LSF    | cgcgccactgtgaacatttcggagcGGatgccccgcgatgagagtcaggaac         | For constructing D12'-13'F/CM |
| SL3-LSR    | ttctgacttcatcgcggggcatCCgctccgaaatgtcacagtggcgcg             | mutants                       |
| SL3-SSF    | acacggtcgcgccactgtgaacatCCcgagcaaatgccccgcgatga              | For constructing D4'-5'F/CM   |
| SL3-SSR    | catcgcggggcattgtctccgGGatgtcacagtggcgcgaccgtgt               | mutants                       |
| 3AGF       | tcgcgccactgtgaacatttcggagcaaGtgccccgcgatgagagtcaggaact       | For constructing D14'F/CM     |
| 3AGR       | agttctgacttcatcgcggggcaCttgctccgaaatgtcacagtggcgcgga         | mutants                       |
| 4TCF       | tcgcgccactgtgaacatttcggagcaaaCgccccgcgatgagagtcaggaact       | For constructing D15'F/CM     |
| 4TCR       | agttctgacttcatcgcggggcGttgctccgaaatgtcacagtggcgcgga          | mutants                       |
| 2-T-F      | gaagtcggttcaagccgacacggt TATAT cactgtgaacatttcggagcaaatgcccc | For constructing N3F/CM       |
| 2-T-R      | ggggcattgtctccgaaatgtcacagtGATATAaccgtgtcggttgaaccgacttc     | mutants                       |
| 2-AT-F     | aactggccacggacgagccttcaa ATATAggacgcacgatcccagaaaaggaatg     | For constructing N2F/CM       |
| 2-AT-R     | cattccttctcgggatcgtgctgctTATATttaaaggctcgtccgtggccagtt       | mutants                       |
| 3-T-F      | gaagtcggttcaagccgacacggt GGGGC cactgtgaacatttcggagcaaatgcccc | For constructing N1F/CM       |
| 3-T-R      | ggggcattgtctccgaaatgtcacagtGCCCCaccgtgtcggttgaaccgacttc      | mutants                       |
| 3-AT-F     | aactggccacggacgagccttcaa GCCCCggacgcacgatcccagaaaaggaatg     | For constructing AN3F/CM      |
| 4-AT-R     | cattccttctcgggatcgtgctgctGGGGCttaaaggctcgtccgtggccagtt       | and N-AN3F/CM mutants         |
| 4-T-F      | gaagtcggttcaagccgacacggt GGAGC cactgtgaacatttcggagcaaatgcccc | For constructing AN2F/CM      |
| 4-T-R      | ggggcattgtctccgaaatgtcacagtGCTCCaccgtgtcggttgaaccgacttc      | and N-AN2F/CM mutants         |
| 4-AT-F     | aactggccacggacgagccttcaa GCTCCggacgcacgatcccagaaaaggaatg     | For constructing AN1F/CM      |
| 4-AT-R     | cattccttctcgggatcgtgctgctGGAGCttaaaggctcgtccgtggccagtt       | and N-AN1F/CM mutants         |
| SL2-DLF    | aagtcggttcaagccgacacggtcactgtgaacatttcggagcaaatgccc          | For constructing N5F/CM       |
| SL2-DLR    | ggcattgtctccgaaatgtcacagtaccgtgtcggttgaaccgactt              | mutants                       |
| ASL2-DLF   | aactggccacggacgagccttcaaggacgcacgatcccagaaaaggaatg           | For constructing AN5F/CM      |
| ASL2-DLR   | cattccttctcgggatcgtgctgctttaaaggctcgtccgtggccagtt            | and N-AN5F/CM mutants         |
| SL2-SLF    | Aagtcggttcaagccgacacggt gctcgcactgtgaacatttcggagcaaatgccc    | For constructing N4F/CM       |
| SL2-SLR    | ggcattgtctccgaaatgtcacagtgcgagaccgtgtcggttgaaccgactT         | mutants                       |
| ASL2-SLF   | Aactggccacggacgagccttcaacgagcggacgcacgatcccagaaaaggaatg      | For constructing AN4F/CM      |
| ASL2-SLR   | cattccttctcgggatcgtgctgctgctttaaaggctcgtccgtggccagtt         | and N-AN4F/CM mutants         |
| A-site-F   | GagtcaggaactggccacggacgagcctCtaagcgcgggacgcacgatccc          | For constructing AR2F/CM      |
| A-site-R   | gggatcgtgctcccgcgcttgaGaggctcgtccgtggccagttctgactC           | and N-AR2F/CM mutants         |
| A-region-F | gagtcaggaactggccacggacgagTTCCTtaagcgcgggacgcacgatccc         | For constructing AR3F/CM      |
| A-region-R | gggatcgtgctcccgcgcttgaAGGAAactcgtccgtggccagttctgactc         | and N-AR3F/CM mutants         |
| R-S-cbimF  | aagcgcgggacgcacgatcccgagaGaggaatgccgtgcatatcgagaaggcgt       | For constructing AR2CM        |
| R-S-cbimR  | acgccttctcgatatacagggcattcctCtctcgggatcgtgctcccgcgcttg       | mutant                        |
| R-R-cbimF  | caagcgcgggacgcacgatcccgaAGGAAaatgccgtgcatatcgagaaggcgt       | For constructing AR3CM        |
| R-R-cbimR  | acgccttctcgatatacagggcattTTCCTtcgggatcgtgctcccgcgcttg        | mutant                        |
| R-S-GFPF   | caagcgcgggacgcacgatcccgagaGaggaatgccatgggTCGTGCACCACCA       | For constructing AR2F mutant  |
| R-S-GFPR   | TGGTGGTGCGACGAGCCCATggcattcctCtctcgggatcgtgctcccgcgcttg      |                               |
| R-R-GFPF   | caagcgcgggacgcacgatcccgaAGGAAaatgccatgggTCGTGCACCACCA        | For constructing AR3F mutant  |
| R-R-GFPR   | TGGTGGTGCGACGAGCCCATggcattTTCCTtcgggatcgtgctcccgcgcttg       |                               |
| NR-GPF-F   | aagcgcgggacgcacgatcccgacttaggaatgccATGGGCTCGTGCACCACCA       | For constructing AR1F mutant  |
| NR-GPF-R   | TGGTGGTGCGACGAGCCCATggcattcctAAGtcgggatcgtgctcccgcgctt       |                               |
| NR-cbiM-F  | aagcgcgggacgcacgatcccgaCTTaggaatgccgtgcatatcgagaaggcgt       | For constructing AR1CM        |
| NR-cbiM-R  | acgccttctcgatatacagggcattcctAAGtcgggatcgtgctcccgcgctt        | mutant                        |
| ANR-F      | aggaactggccacggacgagcctAAGaagcgcgggacgcacgatcccga            |                               |

|                                                                                                                                                                                                                |                                                                                                                                                                                                                                                                                                                                                                                                                                                                                                                                                                                   |                                                                                                                                                                                                                                                                                                                                     |
|----------------------------------------------------------------------------------------------------------------------------------------------------------------------------------------------------------------|-----------------------------------------------------------------------------------------------------------------------------------------------------------------------------------------------------------------------------------------------------------------------------------------------------------------------------------------------------------------------------------------------------------------------------------------------------------------------------------------------------------------------------------------------------------------------------------|-------------------------------------------------------------------------------------------------------------------------------------------------------------------------------------------------------------------------------------------------------------------------------------------------------------------------------------|
| ANR-R<br>w-cbiOF<br>w-cbiOR<br>w-tetRF<br>w-tetRR<br>tetR-HidR                                                                                                                                                 | tcgggatcgtgctcccgcgcttCTTaggctcgtccgtggccagttcct<br>gacgcacgatcccgagaaaggaatgcCatgagcgccctgctggccgccac<br>gtggcgccagcagggcgctcatGgcattccttctcgggatcgtgctgc<br>gacgcacgatcccgagaaaggaatgcatGTCCCGCCTCGACAAGTCCAAGGT<br>ACCTTGACTTGTCTGAGGCGGGACATGgcattccttctcgggatcgtgctgc<br>GGCAAGCTTTTAGGAGCCGGACTCGCACTTGAGCTG                                                                                                                                                                                                                                                                | For constructing AR1F/CM<br>and N-AR1F/CM mutants<br>For constructing CbiO- $\Delta$ cobA<br><br>For constructing tetR- $\Delta$ cobA                                                                                                                                                                                               |
| cbiN-hid                                                                                                                                                                                                       | CCCAAGCTTtcaGTGGTGGTggtggtggtggcgcttccgtgatccgggggcccgtcggtc                                                                                                                                                                                                                                                                                                                                                                                                                                                                                                                      | For constructing R-AR3tR and<br>tetR-WT                                                                                                                                                                                                                                                                                             |
| cbiQ-hid                                                                                                                                                                                                       | CCCAAGCTTtcaGTGGTGGTGGTGGTggtgtcgggccaccaccaggctgatcga                                                                                                                                                                                                                                                                                                                                                                                                                                                                                                                            | For constructing CbiN- $\Delta$ cobA<br>mutant                                                                                                                                                                                                                                                                                      |
| cbiO-hid                                                                                                                                                                                                       | CCCAAGCTTtcaGTGGTGGTGGTGGTGGTgtcggggttctcatcggtgttgggtgt                                                                                                                                                                                                                                                                                                                                                                                                                                                                                                                          | For constructing CbiQ- $\Delta$ cobA<br>mutant                                                                                                                                                                                                                                                                                      |
| cobA-hid                                                                                                                                                                                                       | CCCAAGCTTtcaGTGGTGGTGGTGGTGGTGGTggtgctcgtgggcgcgcgatggtc                                                                                                                                                                                                                                                                                                                                                                                                                                                                                                                          | For constructing CbiO- $\Delta$ cobA<br>mutant                                                                                                                                                                                                                                                                                      |
| m-cbiOF<br>m-cbiOR<br>m-tetRF<br>m-tetRR<br>GroL2-RT-F<br>GroL2-RT-R<br>qcbiM-F<br>qcbiM-R<br>qcbiN-F<br>qcbiN-R<br>qcbiQ-F<br>qcbiQ-R<br>qcbiO-F<br>qcbiO-R<br>qcobA-F<br>qcobA-R<br>cbop-hid-R<br>cbop-sbf-F | gacgcacgatcccgagagaggaatgcCatgagcgccctgctggccgccac<br>gtggcgccagcagggcgctcatGgcattcctctctcgggatcgtgctgc<br>gacgcacgatcccgagagaggaatgcatGTCCCGCCTCGACAAGTCCAAGGT<br>ACCTTGACTTGTCTGAGGCGGGACATGgcattcctctctcgggatcgtgctgc<br>CAATGTCGTGTTGGAGAAG<br>CGCCGATCTTGTGGTAGG<br>ctcatcgtgctgatcttcca<br>GAGCTTCTTGTTGAGCACATAG<br>GGTTCCAGCCGCTGTT<br>CCCAGGCAGTAGAAGATGATG<br>CCATCGTGGCTTCGAGAC<br>CCACCAGGCTGATCGAC<br>TGCACCAGATGCGTGAC<br>TCACAGACGATAGCGACCT<br>CCAGGAGGAGATCAACCAAC<br>GCCCCAAGACGAACGAG<br>GGCAAGCTTtcagtgtcgtggtggcgcgat<br>GCGCCTGCAGGcgtcccactacgacggccccacgg | For constructing CobA- $\Delta$ cobA<br>mutant<br>For constructing R-AR3CO<br>mutant<br>For constructing R-AR3tR<br>mutant<br>qPCR<br>qPCR<br>qPCR<br>qPCR<br>qPCR<br>qPCR<br>qPCR<br>qPCR<br>qPCR<br>qPCR<br>qPCR<br>qPCR<br>qPCR<br>qPCR<br>qPCR<br>qPCR<br>qPCR<br>qPCR<br>For constructing OW-<br>operon/ODS1-operon<br>mutants |
